# Supplementary material for: Synthesis, structure and anion binding properties of 1,8-bis(dimesitylboryl)anthracene and its monoborylated analog
Source: Royal Society of Chemistry journal article supplement (doi:10.1039/c9dt03238j), 2019-01-01

## SUPPORTING INFORMATION

### Synthesis, structure and anion binding properties of 1,8-bis(dimesitylboryl)anthracene and its monoborylated analog

Ratanakorn Teerasarunyanon,<sup>a,b</sup> Lewis C. Wilkins,<sup>a</sup> Gyeongjin Park<sup>a</sup> and François P. Gabbaï<sup>\*a</sup>

<sup>a</sup> Department of Chemistry, Texas A&M University, College Station, Texas 77843-3255, United State

<sup>b</sup> Department of Chemistry, Faculty of Science, Chulalongkorn University, Phayathai Road, Bangkok, 10330, Thailand.

#### Contents

|    |                                                         |    |
|----|---------------------------------------------------------|----|
| 1. | NMR spectra                                             | 2  |
| 2. | Solid-state structures.                                 | 5  |
| 4. | Geometry optimized structures and cartesian coordinates | 7  |
| 5. | TD-DFT output                                           | 11 |
| 6. | Spectrophysical studies                                 | 18 |
| 7. | Cyclic voltammograms                                    | 22 |
| 8. | Mass spectroscopic studies                              | 24 |

# 1. NMR spectra

Figure S1.  $^1\text{H}$  NMR (400 MHz,  $\text{CDCl}_3$ , 298 K) spectrum of 1-(dimesitylboryl)anthracene (**1**)

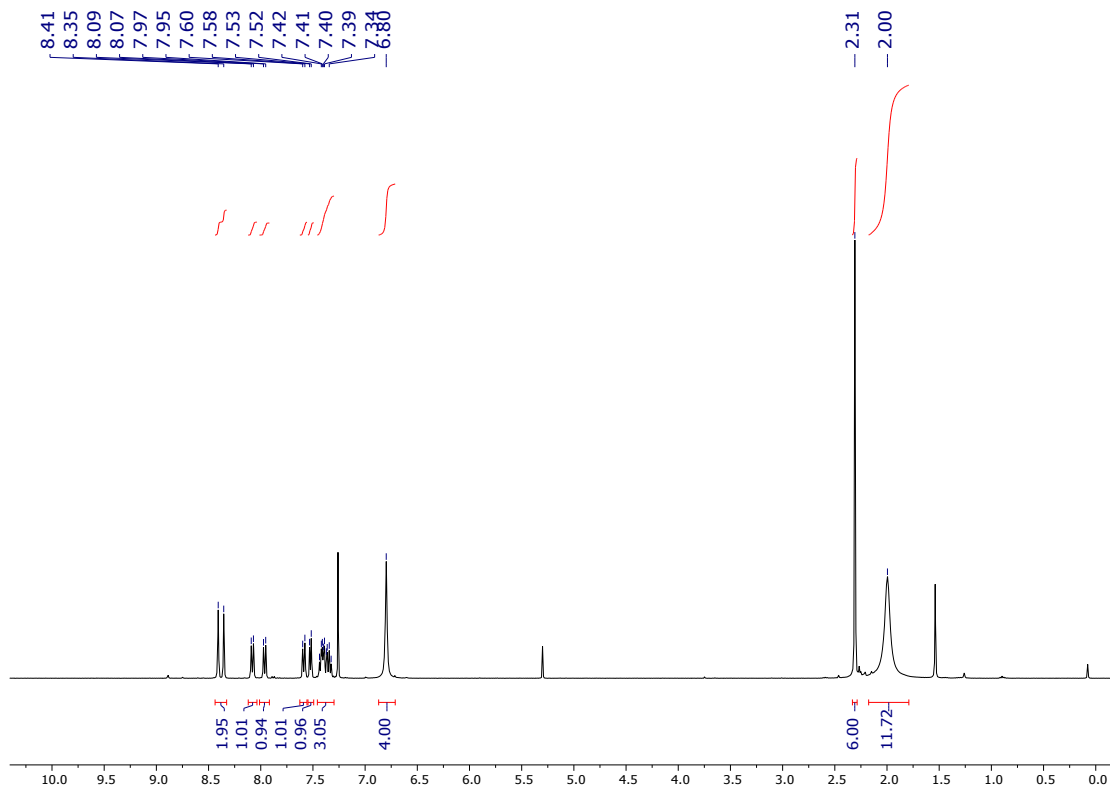

Figure S2.  $^{13}\text{C}$  NMR (101 MHz,  $\text{CDCl}_3$ , 298 K) spectrum of 1-(dimesitylboryl)anthracene (**1**)

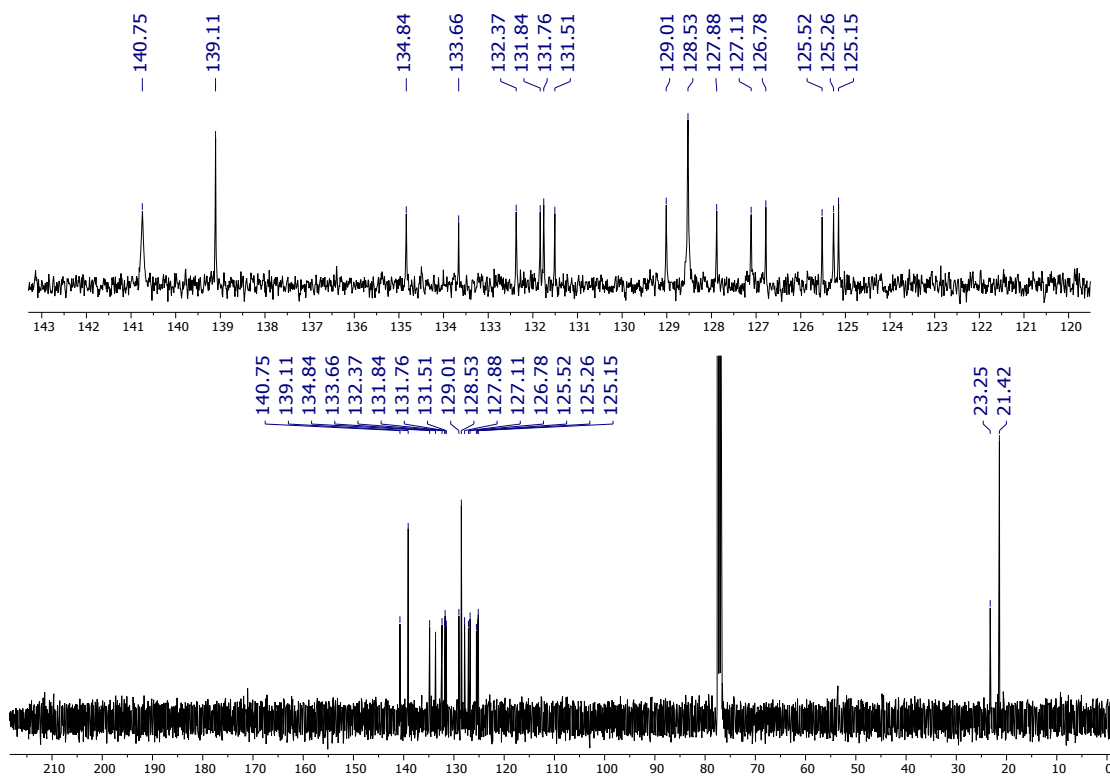

Figure S3.  $^{11}\text{B}$  NMR (128 MHz,  $\text{CDCl}_3$ , 298 K) spectrum of 1-(dimesitylboryl)anthracene (**1**)

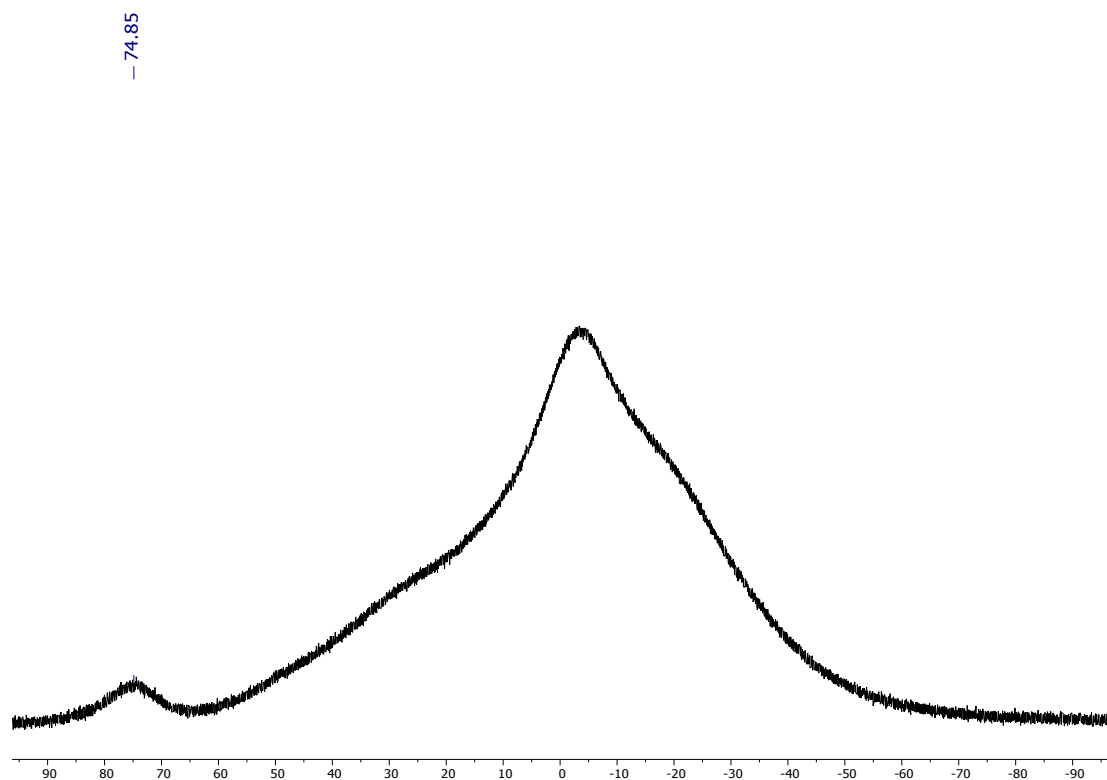

Figure S4.  $^1\text{H}$  NMR (400 MHz,  $\text{CDCl}_3$ , 298 K) spectrum of 1,8-bis(dimesitylboryl)anthracene (**2**)

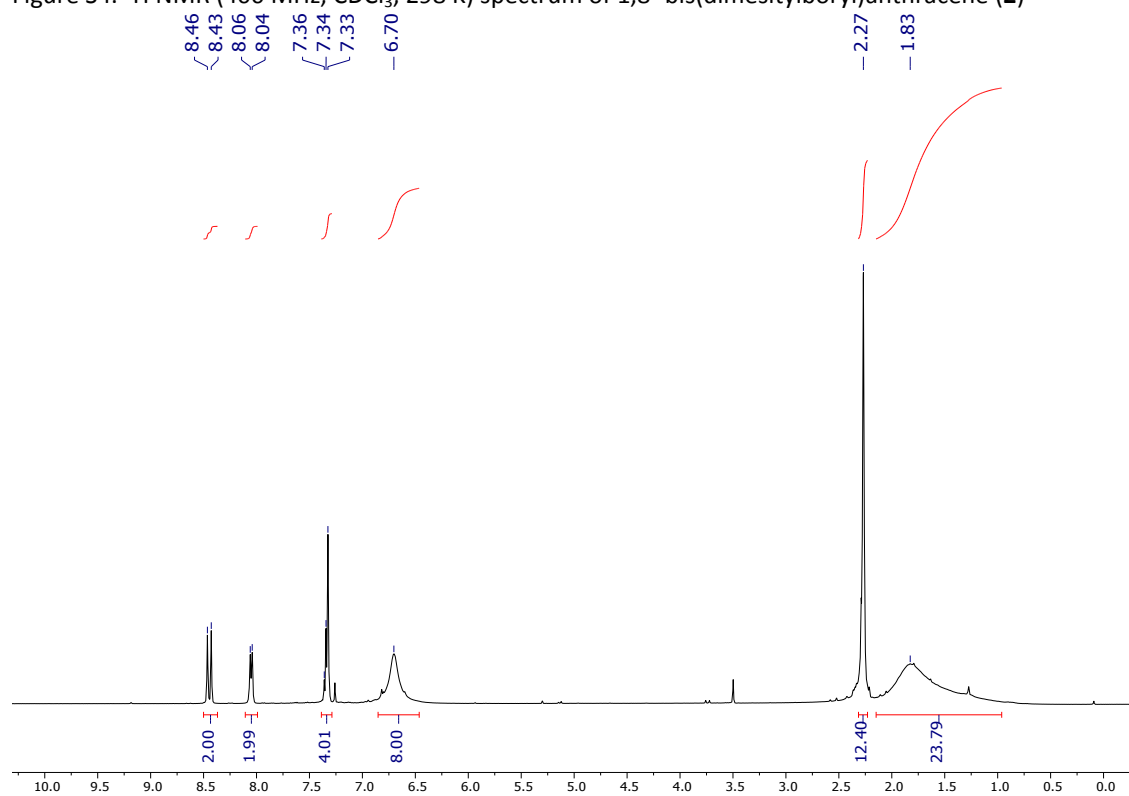

Figure S5.  $^{13}\text{C}$  NMR (126 MHz,  $\text{CD}_2\text{Cl}_2$ , 298 K) spectrum of 1,8- bis(dimesitylboryl)anthracene (**2**)

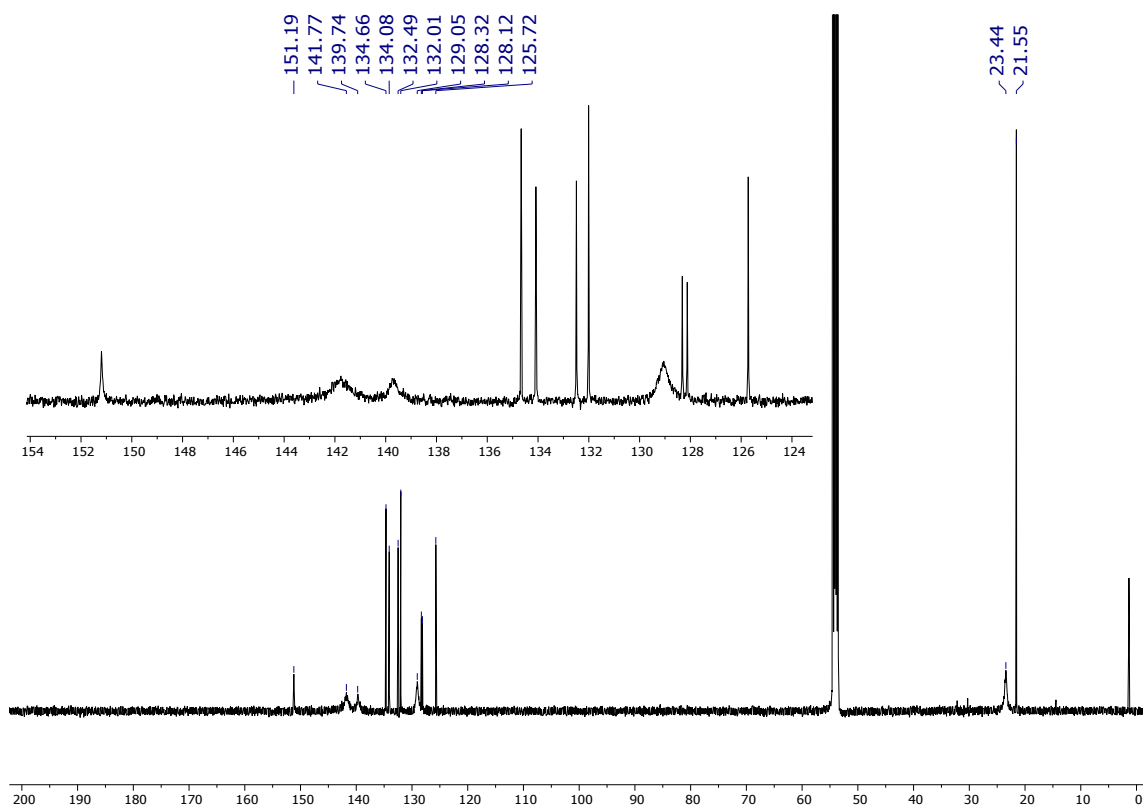

Figure S6.  $^{11}\text{B}$  NMR (128 MHz,  $\text{CDCl}_3$ , 298 K) spectrum of 1,8- bis(dimesitylboryl)anthracene (**2**)

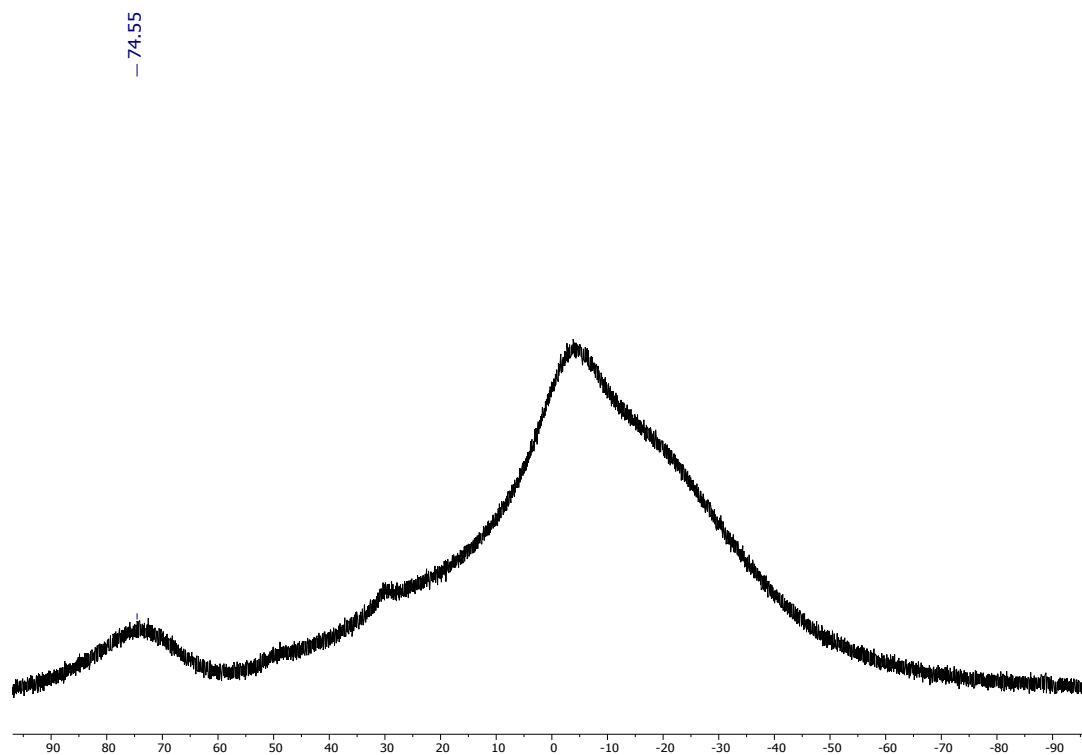

## 2. Solid-state structures.

### X-ray refinement parameters

| Compound                                    | 1                                                             | 2                                                             |
|---------------------------------------------|---------------------------------------------------------------|---------------------------------------------------------------|
| Empirical formula                           | C <sub>32</sub> H <sub>31</sub> B                             | C <sub>50</sub> H <sub>52</sub> B <sub>2</sub>                |
| Formula weight                              | 426.38                                                        | 674.53                                                        |
| Temperature/K                               | 109.99                                                        | 110(2)                                                        |
| Crystal system                              | monoclinic                                                    | Monoclinic                                                    |
| Space group                                 | C2/c                                                          | C2/c                                                          |
| a/Å                                         | 40.663(5)                                                     | 15.5053(18)                                                   |
| b/Å                                         | 8.0101(9)                                                     | 19.059(2)                                                     |
| c/Å                                         | 15.645(2)                                                     | 15.890(3)                                                     |
| α/°                                         | 90                                                            | 90                                                            |
| β/°                                         | 93.812(4)                                                     | 113.204(3)                                                    |
| γ/°                                         | 90                                                            | 90                                                            |
| Volume/Å <sup>3</sup>                       | 5084.5(11)                                                    | 4316.0(11)                                                    |
| Z                                           | 8                                                             | 4                                                             |
| ρ <sub>calc</sub> /cm <sup>3</sup>          | 1.114                                                         | 1.038                                                         |
| μ/mm <sup>-1</sup>                          | 0.062                                                         | 0.058                                                         |
| F(000)                                      | 1824.0                                                        | 1448.0                                                        |
| Crystal size/mm <sup>3</sup>                | 0.344 × 0.172 × 0.05                                          | 0.675 × 0.346 × 0.312                                         |
| Radiation                                   | Mo-Kα (λ = 0.71073)                                           | Mo-Kα (λ = 0.71073)                                           |
| 2θ range for data collection/°              | 5.22 to 54.97                                                 | 5.104 to 60.064                                               |
| Index ranges                                | -52 ≤ h ≤ 52, -10 ≤ k ≤ 10, -20 ≤ l ≤ 20                      | -21 ≤ h ≤ 21, -26 ≤ k ≤ 26, -22 ≤ l ≤ 22                      |
| Reflections collected                       | 28292                                                         | 27732                                                         |
| Independent reflections                     | 5825 [R <sub>int</sub> = 0.0636, R <sub>sigma</sub> = 0.0594] | 6307 [R <sub>int</sub> = 0.0654, R <sub>sigma</sub> = 0.0624] |
| Data/restraints/parameters                  | 5825/0/304                                                    | 6307/0/241                                                    |
| Goodness-of-fit on F <sup>2</sup>           | 1.214                                                         | 1.055                                                         |
| Final R indexes [I ≥ 2σ (I)]                | R <sub>1</sub> = 0.0959, wR <sub>2</sub> = 0.2189             | R <sub>1</sub> = 0.0834, wR <sub>2</sub> = 0.1990             |
| Final R indexes [all data]                  | R <sub>1</sub> = 0.1254, wR <sub>2</sub> = 0.2330             | R <sub>1</sub> = 0.1248, wR <sub>2</sub> = 0.2239             |
| Largest diff. peak/hole / e Å <sup>-3</sup> | 1.15/-0.37                                                    | 0.39/-0.44                                                    |
| CCDC deposition number                      | 1946228                                                       | 1946229                                                       |

## 4. Geometry optimized structures and cartesian coordinates

### S7. Optimized structure and coordinates of 1

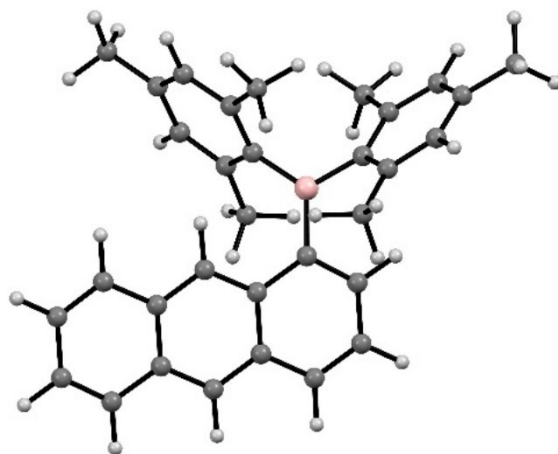

| Atom Number | Coordinates |           |           | Atom Number | Coordinates |           |           |
|-------------|-------------|-----------|-----------|-------------|-------------|-----------|-----------|
|             | X           | Y         | Z         |             | X           | Y         | Z         |
| C1          | 6.163418    | -0.368303 | -1.316855 | B33         | -0.980732   | -0.142520 | 0.279918  |
| C2          | 5.634013    | -1.329374 | -0.505043 | H34         | 7.226427    | -0.369600 | -1.543435 |
| C3          | 1.707638    | -3.308483 | 1.746412  | H35         | 6.264953    | -2.105197 | -0.075787 |
| C4          | -3.382238   | 1.140869  | 1.606020  | H36         | 2.360713    | -4.070876 | 2.167390  |
| C5          | 0.367217    | -3.319568 | 1.996521  | H37         | -3.068645   | 2.093490  | 1.161317  |
| C6          | -1.599314   | 1.724495  | -2.007913 | H38         | -4.319988   | 1.309969  | 2.145214  |
| C7          | 5.328965    | 0.646476  | -1.876370 | H39         | -2.617117   | 0.867187  | 2.341830  |
| C8          | -6.529482   | -1.605036 | -1.169874 | H40         | -0.070300   | -4.093032 | 2.622561  |
| C9          | 0.488222    | 1.099013  | 2.631348  | H41         | -2.668018   | 1.573524  | -1.811271 |
| C10         | 2.290346    | -2.301807 | 0.911841  | H42         | -1.504277   | 2.445687  | -2.826295 |
| C11         | 0.502581    | 5.588099  | 0.411840  | H43         | -1.204269   | 0.764854  | -2.361426 |
| C12         | 3.656964    | -2.308640 | 0.623794  | H44         | 5.768992    | 1.403607  | -2.520101 |
| C13         | -1.594906   | -2.221717 | -1.821697 | H45         | -7.186506   | -0.728536 | -1.171380 |
| C14         | -0.470666   | -2.312260 | 1.433769  | H46         | -6.576299   | -2.070384 | -2.159655 |
| C15         | 3.991026    | 0.667245  | -1.607489 | H47         | -6.941371   | -2.320659 | -0.447277 |
| C16         | 0.025963    | -1.284322 | 0.662211  | H48         | 1.352969    | 0.459598  | 2.414741  |
| C17         | -5.115912   | -1.228655 | -0.806216 | H49         | 0.752177    | 1.746034  | 3.474027  |
| C18         | 4.236686    | -1.339205 | -0.198667 | H50         | -0.322986   | 0.437342  | 2.955771  |
| C19         | -4.025585   | -1.825119 | -1.435392 | H51         | 1.582473    | 5.717194  | 0.551312  |
| C20         | 2.028354    | -0.319180 | -0.474753 | H52         | 0.217167    | 6.100293  | -0.512267 |
| C21         | 3.398333    | -0.322288 | -0.761360 | H53         | 0.005219    | 6.095646  | 1.246878  |
| C22         | -4.862980   | -0.282996 | 0.188159  | H54         | 4.284217    | -3.093070 | 1.046391  |
| C23         | -3.563886   | 0.074731  | 0.546617  | H55         | -1.206802   | -3.069854 | -1.244785 |
| C24         | 1.444128    | -1.276958 | 0.360316  | H56         | -1.958699   | -2.605907 | -2.780511 |
| C25         | -0.511113   | 3.574507  | -0.736022 | H57         | -0.740731   | -1.566144 | -2.026898 |
| C26         | 0.425530    | 3.287804  | 1.443152  | H58         | -1.540077   | -2.348185 | 1.639244  |
| C27         | 0.131695    | 4.127691  | 0.367814  | H59         | 3.348454    | 1.438556  | -2.027647 |
| C28         | -0.562006   | 1.377351  | 0.308279  | H60         | -4.202150   | -2.554748 | -2.225528 |
| C29         | -2.711567   | -1.515258 | -1.079172 | H61         | 1.410125    | 0.459022  | -0.917018 |
| C30         | -2.460575   | -0.548992 | -0.080170 | H62         | -5.702974   | 0.197475  | 0.690026  |
| C31         | -0.876466   | 2.226411  | -0.775204 | H63         | -0.745631   | 4.210701  | -1.589186 |
| C32         | 0.109469    | 1.930932  | 1.424935  | H64         | 0.923487    | 3.703837  | 2.319197  |

S8. Optimized structure and coordinates of **2**

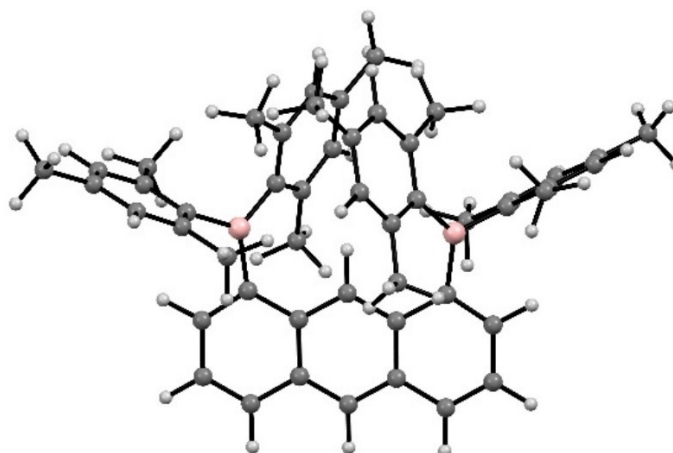

| Atom Number | Coordinates |           |           | Atom Number | Coordinates |           |           |
|-------------|-------------|-----------|-----------|-------------|-------------|-----------|-----------|
|             | X           | Y         | Z         |             | X           | Y         | Z         |
| C1          | -0.864770   | 1.081346  | 3.249334  | H53         | -0.522689   | 1.035068  | 4.288272  |
| C2          | -4.655574   | -0.989552 | 2.575150  | H54         | -0.215501   | 1.788495  | 2.718503  |
| C3          | -7.712368   | -1.693083 | -1.366448 | H55         | -1.873594   | 1.503927  | 3.244310  |
| C4          | -3.236775   | 0.505485  | -2.065190 | H56         | -5.569684   | -1.255508 | 3.115930  |
| C5          | 1.163905    | -3.469415 | 3.435293  | H57         | -3.914481   | -1.780262 | 2.751639  |
| C6          | -2.263639   | -2.611447 | -0.091227 | H58         | -4.253960   | -0.072285 | 3.025085  |
| C7          | -0.800787   | -0.297844 | 2.626208  | H59         | -7.576352   | -2.130674 | -2.361281 |
| C8          | 0.188793    | -2.522575 | 2.786892  | H60         | -8.162967   | -2.451400 | -0.717817 |
| C9          | 0.051569    | -1.213624 | 3.244927  | H61         | -8.434230   | -0.872620 | -1.466136 |
| C10         | -1.461975   | -2.035612 | 1.057249  | H62         | -3.455365   | 0.242076  | -3.106073 |
| C11         | -1.574385   | -0.688837 | 1.499242  | H63         | -3.242375   | 1.600034  | -1.983517 |
| C12         | -0.584321   | -2.911973 | 1.696843  | H64         | -2.209245   | 0.176137  | -1.850560 |
| C13         | -6.404559   | -1.196868 | -0.803074 | H65         | 2.191522    | -3.237665 | 3.123861  |
| C14         | -5.443623   | -0.616046 | -1.633268 | H66         | 1.127797    | -3.392326 | 4.527540  |
| C15         | -6.131090   | -1.283333 | 0.561507  | H67         | 0.958492    | -4.507906 | 3.155908  |
| C16         | -4.246306   | -0.116474 | -1.123668 | H68         | -1.848948   | -3.582191 | -0.382629 |
| C17         | -4.927018   | -0.819740 | 1.096522  | H69         | -3.313802   | -2.760592 | 0.185775  |
| C18         | -3.969856   | -0.228472 | 0.253162  | H70         | -2.247769   | -1.966284 | -0.975390 |
| C19         | -2.353246   | 4.706718  | 0.700961  | H71         | 0.625897    | -0.894570 | 4.115092  |
| C20         | -3.522329   | 2.614338  | 0.964038  | H72         | -0.504384   | -3.935680 | 1.330835  |
| C21         | -3.501613   | 4.038520  | 1.002591  | H73         | -5.636046   | -0.549834 | -2.704451 |
| C22         | -1.167126   | 3.990051  | 0.348058  | H74         | -6.869609   | -1.733300 | 1.225241  |
| C23         | -2.401544   | 1.857362  | 0.689382  | H75         | -2.316965   | 5.794550  | 0.709911  |
| C24         | -1.177170   | 2.553062  | 0.350030  | H76         | -4.463661   | 2.108135  | 1.173038  |
| C25         | 0.864834    | 1.080391  | -3.249668 | H77         | -4.407679   | 4.581644  | 1.258257  |
| C26         | 4.655503    | -0.990334 | -2.574945 | H78         | 0.522713    | 1.033816  | -4.288580 |
| C27         | 7.712471    | -1.692731 | 1.366709  | H79         | 0.215645    | 1.787762  | -2.719038 |
| C28         | 3.236882    | 0.506007  | 2.065024  | H80         | 1.873696    | 1.502884  | -3.244812 |
| C29         | -1.164144   | -3.470298 | -3.434151 | H81         | 5.569568    | -1.256529 | -3.115681 |
| C30         | 2.263565    | -2.611455 | 0.091990  | H82         | 3.914330    | -1.781027 | -2.751172 |
| C31         | 0.000048    | 4.669562  | -0.000605 | H83         | 4.253954    | -0.073159 | -3.025127 |
| C32         | 0.000023    | 1.877020  | -0.000211 | H84         | 7.576687    | -2.129211 | 2.362059  |
| C33         | 0.800763    | -0.298597 | -2.626108 | H85         | 8.162599    | -2.451887 | 0.718728  |
| C34         | -0.188955   | -2.523319 | -2.786068 | H86         | 8.434633    | -0.872389 | 1.465231  |

|     |           |           |           |      |           |           |           |
|-----|-----------|-----------|-----------|------|-----------|-----------|-----------|
| C35 | -0.051666 | -1.214515 | -3.244512 | H87  | 3.455464  | 0.242831  | 3.105967  |
| C36 | 1.461905  | -2.035919 | -1.056638 | H88  | 3.242543  | 1.600537  | 1.983094  |
| C37 | 1.574361  | -0.689282 | -1.499029 | H89  | 2.209332  | 0.176667  | 1.850481  |
| C38 | 0.584184  | -2.912431 | -1.695939 | H90  | -2.191784 | -3.238098 | -3.123133 |
| C39 | 6.404615  | -1.196706 | 0.803278  | H91  | -1.127730 | -3.393882 | -4.526437 |
| C40 | 5.443706  | -0.615669 | 1.633341  | H92  | -0.959066 | -4.508674 | -3.154090 |
| C41 | 6.131102  | -1.283547 | -0.561277 | H93  | 1.848872  | -3.582123 | 0.383644  |
| C42 | 4.246370  | -0.116227 | 1.123640  | H94  | 3.313731  | -2.760669 | -0.184964 |
| C43 | 4.927014  | -0.820111 | -1.096376 | H95  | 2.247691  | -1.966063 | 0.975987  |
| C44 | 3.969879  | -0.228604 | -0.253146 | H96  | 0.000058  | 5.759260  | -0.000763 |
| C45 | 2.353329  | 4.706481  | -0.702216 | H97  | 0.000004  | 0.788124  | -0.000062 |
| C46 | 3.522365  | 2.614012  | -0.964768 | H98  | -0.626003 | -0.895695 | -4.114758 |
| C47 | 3.501675  | 4.038184  | -1.003700 | H99  | 0.504201  | -3.936018 | -1.329608 |
| C48 | 1.167205  | 3.989930  | -0.349087 | H100 | 5.636161  | -0.549164 | 2.704500  |
| C49 | 2.401579  | 1.857127  | -0.689867 | H101 | 6.869598  | -1.733702 | -1.224910 |
| C50 | 1.177226  | 2.552939  | -0.350657 | H102 | 2.317065  | 5.794312  | -0.711467 |
| B51 | -2.590723 | 0.298415  | 0.812813  | H103 | 4.463682  | 2.107738  | -1.173668 |
| B52 | 2.590728  | 0.298142  | -0.812885 | H104 | 4.407741  | 4.581224  | -1.259548 |

S9. Optimized structure and coordinates of [1-F]<sup>-</sup>

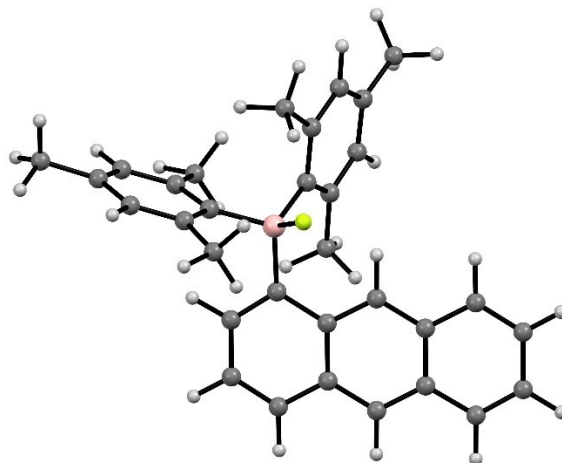

| Atom Number | Coordinates |           |           | Atom Number | Coordinates |           |           |
|-------------|-------------|-----------|-----------|-------------|-------------|-----------|-----------|
|             | X           | Y         | Z         |             | X           | Y         | Z         |
| F1          | 0.276295    | -0.191989 | -1.723394 | B34         | 0.756988    | -0.125414 | -0.332073 |
| C2          | -0.717158   | 1.278376  | 2.222075  | H35         | -3.712705   | 1.443031  | -2.045714 |
| C3          | 2.987840    | 0.716136  | 1.734607  | H36         | -0.892959   | 1.909595  | 3.101491  |
| C4          | 6.410955    | -2.238131 | -0.396874 | H37         | -1.691071   | 0.913537  | 1.877014  |
| C5          | 1.732205    | -2.379003 | -2.160479 | H38         | -0.150580   | 0.399589  | 2.542571  |
| C6          | 0.558063    | 5.832510  | 0.647396  | H39         | 3.766051    | 0.666224  | 2.506364  |
| C7          | 2.198150    | 1.912693  | -1.982205 | H40         | 2.941466    | 1.746682  | 1.362615  |
| C8          | -0.002845   | 2.076785  | 1.147846  | H41         | 2.024086    | 0.510857  | 2.212285  |
| C9          | 0.617351    | 4.337348  | 0.454907  | H42         | 7.001559    | -1.692129 | -1.145193 |
| C10         | -0.016431   | 3.466318  | 1.331345  | H43         | 6.915821    | -2.116921 | 0.568688  |
| C11         | 1.339274    | 2.390473  | -0.826485 | H44         | 6.447884    | -3.300055 | -0.668264 |
| C12         | 0.667401    | 1.491738  | 0.046979  | H45         | 2.154711    | -3.317161 | -2.542116 |
| C13         | 1.300635    | 3.771463  | -0.617955 | H46         | 0.776192    | -2.596061 | -1.673187 |
| C14         | 4.989873    | -1.734490 | -0.338520 | H47         | 1.501831    | -1.727417 | -3.009039 |
| C15         | 4.015870    | -2.210454 | -1.212457 | H48         | -0.275159   | 6.278046  | 0.086823  |



|     |           |           |           |     |           |           |           |
|-----|-----------|-----------|-----------|-----|-----------|-----------|-----------|
| C16 | 4.594258  | -0.781879 | 0.592944  | H49 | 0.416245  | 6.093150  | 1.702812  |
| C17 | 2.704165  | -1.727503 | -1.197628 | H50 | 1.478387  | 6.316237  | 0.298673  |
| C18 | 3.287594  | -0.279494 | 0.631468  | H51 | 2.496838  | 2.761905  | -2.609110 |
| C19 | 2.308834  | -0.707735 | -0.295127 | H52 | 3.111427  | 1.430037  | -1.610624 |
| C20 | -1.861302 | -3.046479 | 1.930690  | H53 | 1.678863  | 1.176621  | -2.599259 |
| C21 | 0.299333  | -2.089592 | 1.380115  | H54 | -0.539435 | 3.877094  | 2.196934  |
| C22 | -0.508281 | -3.024387 | 2.095467  | H55 | 1.835299  | 4.425107  | -1.309917 |
| C23 | -2.483618 | -2.118686 | 1.038454  | H56 | 4.279983  | -2.996823 | -1.922599 |
| C24 | -0.218024 | -1.158224 | 0.510250  | H57 | 5.319986  | -0.420554 | 1.324060  |
| C25 | -1.659158 | -1.172749 | 0.327575  | H58 | -2.488264 | -3.757800 | 2.466788  |
| C26 | -3.871515 | -2.111148 | 0.863333  | H59 | 1.377316  | -2.123892 | 1.532948  |
| C27 | -2.300678 | -0.248146 | -0.508504 | H60 | -0.030764 | -3.730579 | 2.773459  |
| C28 | -5.917934 | -1.159773 | -0.166483 | H61 | -4.477783 | -2.836739 | 1.407212  |
| C29 | -5.693119 | 0.721883  | -1.678912 | H62 | -1.695289 | 0.479343  | -1.042495 |
| C30 | -6.497246 | -0.236008 | -0.988160 | H63 | -6.525937 | -1.891930 | 0.363427  |
| C31 | -4.499597 | -1.191143 | 0.022961  | H64 | -6.169359 | 1.451329  | -2.329893 |
| C32 | -4.336326 | 0.719729  | -1.523459 | H65 | -7.576862 | -0.224053 | -1.122077 |
| C33 | -3.690133 | -0.232312 | -0.672458 |     |           |           |           |

S10. Optimized structure and coordinates of [2-F]<sup>-</sup>

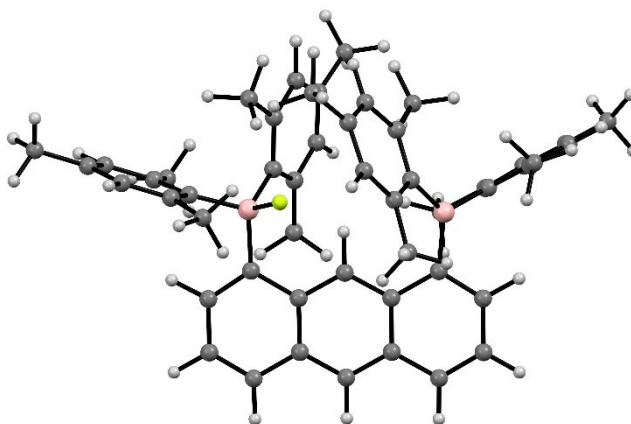

| Atom Number | Coordinates |           |           | Atom Number | Coordinates |           |           |
|-------------|-------------|-----------|-----------|-------------|-------------|-----------|-----------|
|             | X           | Y         | Z         |             | X           | Y         | Z         |
| F1          | 1.676868    | 0.091547  | 1.098186  | H54         | 0.464581    | 0.485850  | -4.091288 |
| C2          | 0.681327    | 0.642454  | -3.027576 | H55         | -0.114691   | 1.279922  | -2.621074 |
| C3          | 4.126936    | -0.788079 | -2.550381 | H56         | 1.609539    | 1.212866  | -2.948390 |
| C4          | 8.109693    | -1.382549 | 0.428203  | H57         | 4.939794    | -0.852757 | -3.284445 |
| C5          | 3.940626    | 0.560174  | 2.390851  | H58         | 3.489743    | -1.673159 | -2.666942 |
| C6          | -0.773947   | -4.124871 | -3.086763 | H59         | 3.510058    | 0.081262  | -2.804016 |
| C7          | 2.369369    | -2.699546 | 0.520707  | H60         | 8.206249    | -2.178854 | 1.177512  |
| C8          | 0.755641    | -0.696598 | -2.316708 | H61         | 8.533437    | -1.755821 | -0.510951 |
| C9          | 0.053081    | -3.035929 | -2.452365 | H62         | 8.733667    | -0.545466 | 0.767611  |
| C10         | 0.047750    | -1.736798 | -2.941502 | H63         | 4.699299    | 0.814014  | 3.142020  |
| C11         | 1.526783    | -2.268845 | -0.664301 | H64         | 3.384306    | 1.465582  | 2.127772  |
| C12         | 1.498475    | -0.925260 | -1.135041 | H65         | 3.210138    | -0.119155 | 2.844818  |
| C13         | 0.820554    | -3.281559 | -1.315530 | H66         | -1.733219   | -4.245414 | -2.563134 |
| C14         | 6.671190    | -0.963577 | 0.248168  | H67         | -0.999482   | -3.897564 | -4.135029 |
| C15         | 5.936924    | -0.438471 | 1.310293  | H68         | -0.259912   | -5.092910 | -3.050223 |
| C16         | 6.032525    | -1.052794 | -0.982535 | H69         | 2.034495    | -3.678041 | 0.889334  |
| C17         | 4.602828    | -0.049180 | 1.171273  | H70         | 3.425953    | -2.789293 | 0.235876  |

|     |           |           |           |      |           |           |           |
|-----|-----------|-----------|-----------|------|-----------|-----------|-----------|
| C18 | 4.694049  | -0.675135 | -1.149613 | H71  | 2.310359  | -1.976504 | 1.337098  |
| C19 | 3.925050  | -0.199461 | -0.065062 | H72  | -0.521495 | -1.513154 | -3.846094 |
| C20 | 2.106152  | 4.613973  | -1.185033 | H73  | 0.867409  | -4.297757 | -0.917149 |
| C21 | 3.301241  | 2.505154  | -1.075384 | H74  | 6.423516  | -0.314689 | 2.280122  |
| C22 | 3.255080  | 3.902646  | -1.363810 | H75  | 6.589920  | -1.421281 | -1.845857 |
| C23 | 0.928597  | 3.950300  | -0.721015 | H76  | 2.059508  | 5.682468  | -1.391077 |
| C24 | 2.213185  | 1.791374  | -0.627027 | H77  | 4.251511  | 1.990312  | -1.209903 |
| C25 | 0.981067  | 2.537762  | -0.449943 | H78  | 4.156106  | 4.401304  | -1.718457 |
| C26 | -1.399503 | 1.570652  | 3.246860  | H79  | -1.132466 | 1.687464  | 4.302940  |
| C27 | -4.927799 | -0.819651 | 2.478384  | H80  | -0.793988 | 2.278845  | 2.668605  |
| C28 | -7.547221 | -2.157370 | -1.614373 | H81  | -2.446908 | 1.863812  | 3.124970  |
| C29 | -3.114847 | 0.169856  | -2.154643 | H82  | -5.864211 | -1.119235 | 2.962177  |
| C30 | 1.191374  | -2.623460 | 4.007832  | H83  | -4.133212 | -1.498292 | 2.813602  |
| C31 | -2.054598 | -2.554884 | 0.215110  | H84  | -4.662494 | 0.180710  | 2.844996  |
| C32 | -0.271866 | 4.645071  | -0.547394 | H85  | -7.284744 | -2.751006 | -2.497348 |
| C33 | -0.204036 | 1.898707  | -0.054694 | H86  | -8.061831 | -2.813425 | -0.903900 |
| C34 | -1.126679 | 0.150981  | 2.798468  | H87  | -8.265404 | -1.392677 | -1.938304 |
| C35 | 0.136233  | -1.884944 | 3.227065  | H88  | -3.204693 | -0.242183 | -3.166106 |
| C36 | -0.217030 | -0.579774 | 3.559134  | H89  | -3.185643 | 1.263231  | -2.221305 |
| C37 | -1.435861 | -1.790945 | 1.366926  | H90  | -2.101981 | -0.062121 | -1.796607 |
| C38 | -1.752175 | -0.439612 | 1.669645  | H91  | 2.192749  | -2.302413 | 3.692841  |
| C39 | -0.493811 | -2.474005 | 2.135363  | H92  | 1.104714  | -2.428703 | 5.083233  |
| C40 | -6.323680 | -1.529219 | -0.994053 | H93  | 1.125534  | -3.704572 | 3.843373  |
| C41 | -5.307321 | -1.006497 | -1.795726 | H94  | -1.593797 | -3.544871 | 0.139305  |
| C42 | -6.185768 | -1.435291 | 0.389616  | H95  | -3.135248 | -2.685980 | 0.341712  |
| C43 | -4.186606 | -0.387853 | -1.243643 | H96  | -1.883604 | -2.055252 | -0.746576 |
| C44 | -5.059755 | -0.847576 | 0.971717  | H97  | -0.299452 | 5.716093  | -0.752475 |
| C45 | -4.046828 | -0.314588 | 0.156621  | H98  | -0.167027 | 0.828068  | 0.128309  |
| C46 | -2.670821 | 4.713219  | 0.018683  | H99  | 0.252785  | -0.104499 | 4.420514  |
| C47 | -3.802459 | 2.644655  | 0.541713  | H100 | -0.236237 | -3.497246 | 1.862445  |
| C48 | -3.819224 | 4.057948  | 0.354957  | H101 | -5.391925 | -1.083172 | -2.880527 |
| C49 | -1.441015 | 4.000938  | -0.142413 | H102 | -6.967431 | -1.841160 | 1.032926  |
| C50 | -2.641548 | 1.905081  | 0.461168  | H103 | -2.669476 | 5.789881  | -0.147747 |
| C51 | -1.414514 | 2.584106  | 0.100258  | H104 | -4.741942 | 2.138019  | 0.762664  |
| B52 | 2.324415  | 0.194298  | -0.218096 | H105 | -4.754741 | 4.602508  | 0.463500  |
| B53 | -2.760252 | 0.367059  | 0.779170  |      |           |           |           |

## 5. TD-DFT output

Excitation energies and oscillator strengths for **1** between 300-600 nm.

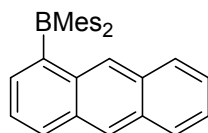

Excited State 1: Singlet-A 2.9819 eV 415.79 nm f=0.1892 <S\*\*2>=0.000  
 114 ->115 0.69386  
 114 ->116 0.10420

This state for optimization and/or second-order correction.

Total Energy, E(TD-HF/TD-KS) = -1262.57239304

Copying the excited state density for this state as the 1-particle RhoCI density.

Excited State 2: Singlet-A 3.5677 eV 347.52 nm f=0.0875 <S\*\*2>=0.000  
113 ->115 0.64911  
113 ->116 0.16963  
114 ->116 0.19380

Excited State 3: Singlet-A 3.5969 eV 344.69 nm f=0.0205 <S\*\*2>=0.000  
113 ->115 -0.19670  
114 ->116 0.65683

Excited State 4: Singlet-A 3.8123 eV 325.22 nm f=0.0459 <S\*\*2>=0.000  
109 ->115 -0.10747  
111 ->115 -0.16171  
112 ->115 0.64691  
112 ->116 0.12385

Excited State 5: Singlet-A 3.8628 eV 320.97 nm f=0.0186 <S\*\*2>=0.000  
109 ->115 0.10122  
111 ->115 0.63491  
111 ->116 0.14004  
112 ->115 0.18904  
114 ->117 0.11342

Excited State 6: Singlet-A 3.9198 eV 316.30 nm f=0.0231 <S\*\*2>=0.000  
110 ->115 0.65762  
110 ->116 0.15641  
111 ->115 0.11923

Excited State 7: Singlet-A 3.9475 eV 314.09 nm f=0.0138 <S\*\*2>=0.000  
109 ->115 0.52504  
109 ->116 -0.11190  
110 ->115 0.12915  
111 ->115 -0.15181  
114 ->117 0.38277

Excitation energies and oscillator strengths for **2** between 300-600 nm.

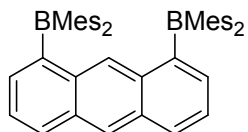

Excited State 1: Singlet-A 2.9477 eV 420.61 nm f=0.2098 <S\*\*2>=0.000  
181 ->182 0.70077

This state for optimization and/or second-order correction.

Total Energy, E(TD-HF/TD-KS) = -1985.84755903

Copying the excited state density for this state as the 1-particle RhoCl density.

Excited State 2: Singlet-A 3.1254 eV 396.70 nm f=0.0268 <S\*\*2>=0.000  
181 ->183 0.69833

|                   |           |           |           |          |              |
|-------------------|-----------|-----------|-----------|----------|--------------|
| Excited State 3:  | Singlet-A | 3.5234 eV | 351.88 nm | f=0.1271 | <S**2>=0.000 |
| 179 ->183         | 0.32205   |           |           |          |              |
| 180 ->182         | 0.61055   |           |           |          |              |
| 180 ->184         | 0.10018   |           |           |          |              |
| Excited State 4:  | Singlet-A | 3.5398 eV | 350.25 nm | f=0.0009 | <S**2>=0.000 |
| 179 ->182         | 0.58560   |           |           |          |              |
| 179 ->184         | 0.10652   |           |           |          |              |
| 180 ->183         | 0.36212   |           |           |          |              |
| Excited State 5:  | Singlet-A | 3.7129 eV | 333.93 nm | f=0.0009 | <S**2>=0.000 |
| 181 ->184         | 0.69135   |           |           |          |              |
| Excited State 6:  | Singlet-A | 3.7236 eV | 332.97 nm | f=0.0069 | <S**2>=0.000 |
| 177 ->183         | 0.11909   |           |           |          |              |
| 178 ->182         | 0.67347   |           |           |          |              |
| Excited State 7:  | Singlet-A | 3.7923 eV | 326.94 nm | f=0.0177 | <S**2>=0.000 |
| 172 ->182         | -0.28884  |           |           |          |              |
| 175 ->183         | -0.14021  |           |           |          |              |
| 176 ->182         | 0.50460   |           |           |          |              |
| 177 ->182         | -0.27981  |           |           |          |              |
| 178 ->183         | -0.12712  |           |           |          |              |
| 181 ->185         | 0.16452   |           |           |          |              |
| Excited State 8:  | Singlet-A | 3.8620 eV | 321.04 nm | f=0.0278 | <S**2>=0.000 |
| 173 ->182         | -0.15871  |           |           |          |              |
| 176 ->182         | 0.27723   |           |           |          |              |
| 177 ->182         | 0.40961   |           |           |          |              |
| 178 ->183         | 0.44414   |           |           |          |              |
| Excited State 9:  | Singlet-A | 3.8837 eV | 319.24 nm | f=0.0143 | <S**2>=0.000 |
| 175 ->182         | 0.63536   |           |           |          |              |
| 176 ->183         | -0.14758  |           |           |          |              |
| 177 ->183         | 0.16810   |           |           |          |              |
| 180 ->183         | -0.13938  |           |           |          |              |
| Excited State 10: | Singlet-A | 3.9138 eV | 316.79 nm | f=0.0001 | <S**2>=0.000 |
| 172 ->182         | 0.32867   |           |           |          |              |
| 173 ->182         | 0.24625   |           |           |          |              |
| 176 ->182         | 0.31357   |           |           |          |              |
| 179 ->183         | 0.30136   |           |           |          |              |
| 180 ->182         | -0.15486  |           |           |          |              |
| 181 ->185         | -0.30077  |           |           |          |              |
| Excited State 11: | Singlet-A | 3.9585 eV | 313.21 nm | f=0.0129 | <S**2>=0.000 |
| 172 ->182         | -0.28663  |           |           |          |              |
| 173 ->182         | 0.26602   |           |           |          |              |

174 ->183 -0.19761  
 175 ->183 0.22118  
 177 ->182 0.34424  
 178 ->183 -0.26998  
 179 ->183 0.17018  
 181 ->185 0.12769

Excited State 12: Singlet-A 3.9775 eV 311.71 nm f=0.0149 <S\*\*2>=0.000  
 174 ->182 0.60061  
 177 ->183 -0.25916  
 180 ->183 -0.17472

Excited State 13: Singlet-A 3.9898 eV 310.75 nm f=0.0428 <S\*\*2>=0.000  
 174 ->182 0.17355  
 175 ->182 0.13197  
 176 ->183 -0.16299  
 179 ->182 -0.34840  
 179 ->184 0.12446  
 180 ->183 0.52240

Excited State 14: Singlet-A 4.0114 eV 309.08 nm f=0.0678 <S\*\*2>=0.000  
 172 ->182 -0.18009  
 174 ->183 0.15454  
 176 ->182 -0.14015  
 177 ->182 -0.15062  
 178 ->183 0.23864  
 179 ->183 0.44446  
 180 ->182 -0.29685  
 180 ->184 0.12856  
 181 ->185 0.16290

Excited State 15: Singlet-A 4.1144 eV 301.34 nm f=0.0104 <S\*\*2>=0.000  
 172 ->182 -0.14438  
 173 ->182 0.54219  
 177 ->182 -0.15010  
 178 ->183 0.33777  
 179 ->183 -0.15766

Excitation energies and oscillator strengths for [1-F]<sup>-</sup> between 300-600 nm.

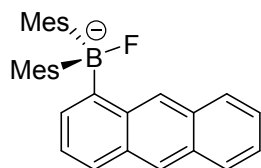

Excited State 1: Singlet-A 3.2327 eV 383.53 nm f=0.1120 <S\*\*2>=0.000  
 119 ->120 0.70103

This state for optimization and/or second-order correction.

Total Energy, E(TD-HF/TD-KS) = -1362.53693173

Copying the excited state density for this state as the 1-particle RhoCI density.

Excited State 2: Singlet-A 3.6975 eV 335.32 nm f=0.0002 <S\*\*2>=0.000  
117 ->120 0.13106  
118 ->120 0.68274

Excited State 3: Singlet-A 3.8171 eV 324.82 nm f=0.0048 <S\*\*2>=0.000  
117 ->120 0.67879  
118 ->120 -0.12835

Excited State 4: Singlet-A 3.9737 eV 312.01 nm f=0.0035 <S\*\*2>=0.000  
113 ->120 0.43797  
115 ->120 -0.14371  
116 ->120 0.15251  
117 ->120 0.13291  
119 ->121 0.48577

Excited State 5: Singlet-A 4.1288 eV 300.29 nm f=0.0044 <S\*\*2>=0.000  
113 ->120 -0.15015  
115 ->120 -0.19105  
116 ->120 0.64508  
119 ->121 -0.13115

Excitation energies and oscillator strengths for [2-F] between 300-600 nm.

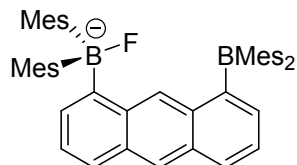

Excited State 1: Singlet-A 2.7781 eV 446.29 nm f=0.1118 <S\*\*2>=0.000  
186 ->187 0.69942

This state for optimization and/or second-order correction.

Total Energy, E(TD-HF/TD-KS) = -2085.82279722

Copying the excited state density for this state as the 1-particle RhoCI density.

Excited State 2: Singlet-A 3.3385 eV 371.37 nm f=0.0028 <S\*\*2>=0.000  
184 ->187 0.23411  
185 ->187 0.66249

Excited State 3: Singlet-A 3.4211 eV 362.41 nm f=0.0283 <S\*\*2>=0.000  
184 ->187 0.12691  
186 ->188 0.67521

Excited State 4: Singlet-A 3.4547 eV 358.88 nm f=0.0087 <S\*\*2>=0.000  
184 ->187 0.64334  
185 ->187 -0.22933  
186 ->188 -0.12956

Excited State 5: Singlet-A 3.6150 eV 342.97 nm f=0.0210 <S\*\*2>=0.000  
179 ->187 -0.12006  
181 ->187 -0.15509  
183 ->187 0.66262

Excited State 6: Singlet-A 3.6775 eV 337.15 nm f=0.0775 <S\*\*2>=0.000  
177 ->187 -0.11722  
179 ->187 0.16077  
181 ->187 0.61694  
181 ->188 0.10296  
183 ->187 0.19015

Excited State 7: Singlet-A 3.7951 eV 326.69 nm f=0.0328 <S\*\*2>=0.000  
177 ->187 0.10620  
177 ->188 -0.10552  
178 ->187 -0.20755  
179 ->187 0.13765  
180 ->187 0.59116  
186 ->189 -0.19297

Excited State 8: Singlet-A 3.8984 eV 318.04 nm f=0.0083 <S\*\*2>=0.000  
177 ->187 0.31646  
178 ->187 -0.17003  
179 ->187 0.25341  
180 ->187 -0.27014  
180 ->188 -0.11838  
183 ->187 0.11345  
184 ->188 -0.13802  
185 ->188 -0.29536  
186 ->189 -0.25668

Excited State 9: Singlet-A 3.9211 eV 316.20 nm f=0.0059 <S\*\*2>=0.000  
177 ->187 0.27818  
179 ->187 -0.12301  
182 ->187 0.22239  
185 ->188 0.52148  
186 ->189 -0.21713

Excited State 10: Singlet-A 3.9345 eV 315.12 nm f=0.0018 <S\*\*2>=0.000  
179 ->187 -0.13720  
180 ->187 0.12225  
182 ->187 0.63608  
185 ->188 -0.19908

Excited State 11: Singlet-A 3.9494 eV 313.93 nm f=0.0565 <S\*\*2>=0.000  
177 ->187 -0.25380  
178 ->187 -0.34311  
179 ->187 0.36245

|           |          |
|-----------|----------|
| 180 ->187 | -0.11405 |
| 181 ->187 | -0.19460 |
| 182 ->187 | 0.12718  |
| 185 ->188 | 0.24626  |
| 186 ->189 | 0.13368  |

Excited State 12: Singlet-A 4.0197 eV 308.44 nm f=0.0021 <S\*\*2>=0.000

|           |          |
|-----------|----------|
| 184 ->188 | 0.67193  |
| 185 ->188 | -0.10480 |

Excited State 13: Singlet-A 4.0894 eV 303.18 nm f=0.0068 <S\*\*2>=0.000

|           |          |
|-----------|----------|
| 178 ->187 | 0.50781  |
| 179 ->187 | 0.42013  |
| 181 ->187 | -0.10697 |



## 6. Spectrophysical studies

### UV-vis spectra and binding isotherms

Figure S11. UV-vis spectrum of **1** titrated against TBACN. The inset shows a plot of the absorbance at 389 nm as a function of fluoride concentration.

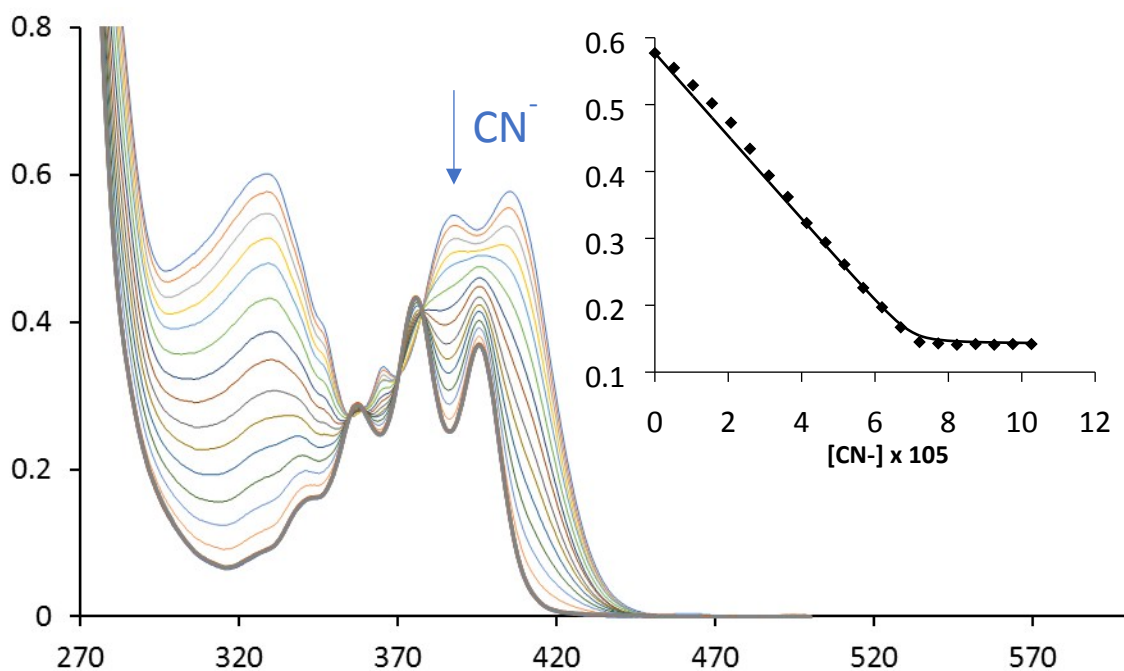

Figure S12. UV-vis spectrum of **2** titrated against TBAF. The inset shows a plot of the absorbance at 400 nm as a function of fluoride concentration.

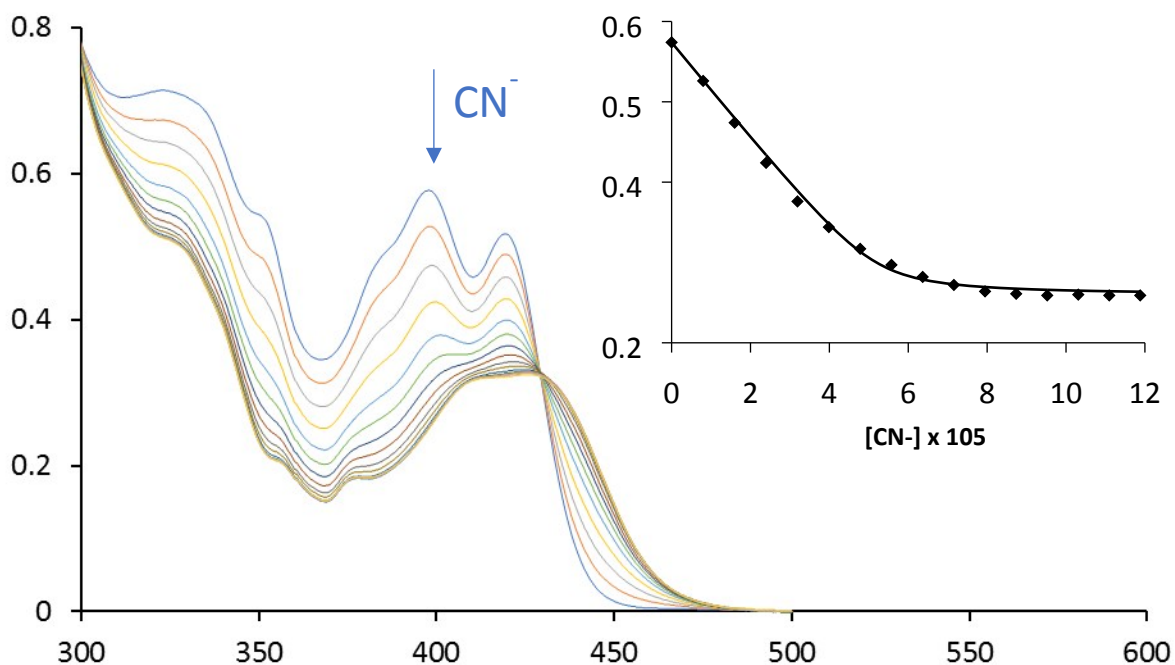

## Fluorescence emission spectra and quantum yield

Figure S13. Emission spectrum of **1** titrated against TBAF. Quantum yield determination inset

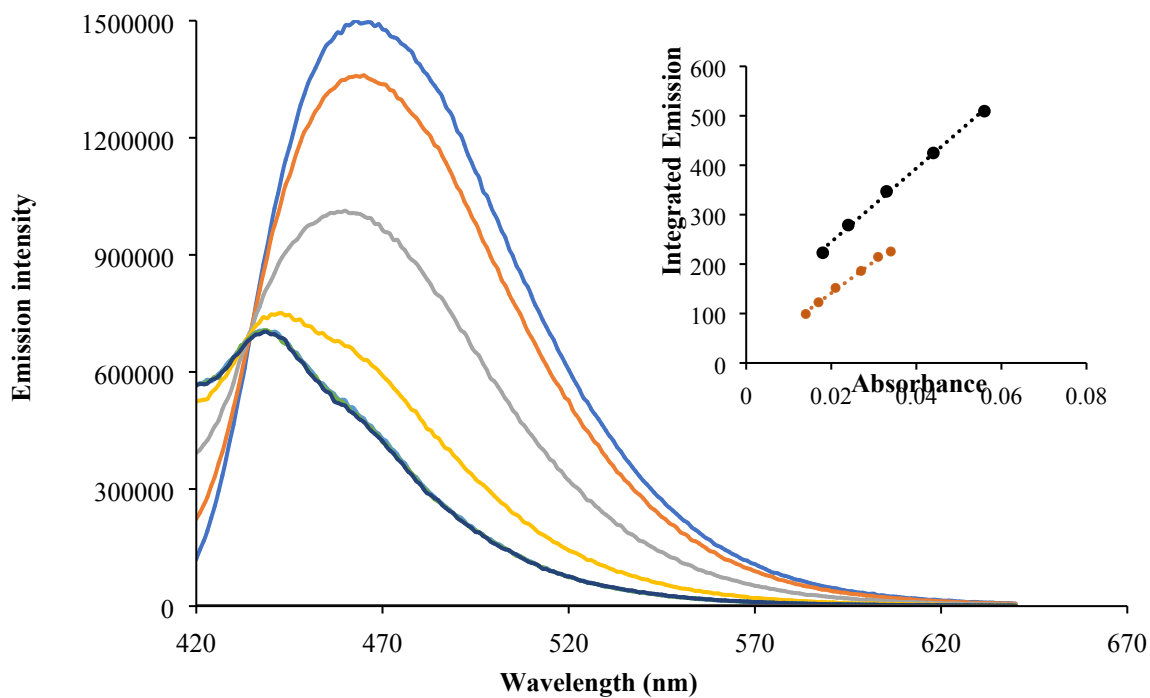

Figure S14. Emission spectrum of **2** titrated against TBAF. Quantum yield determination inset

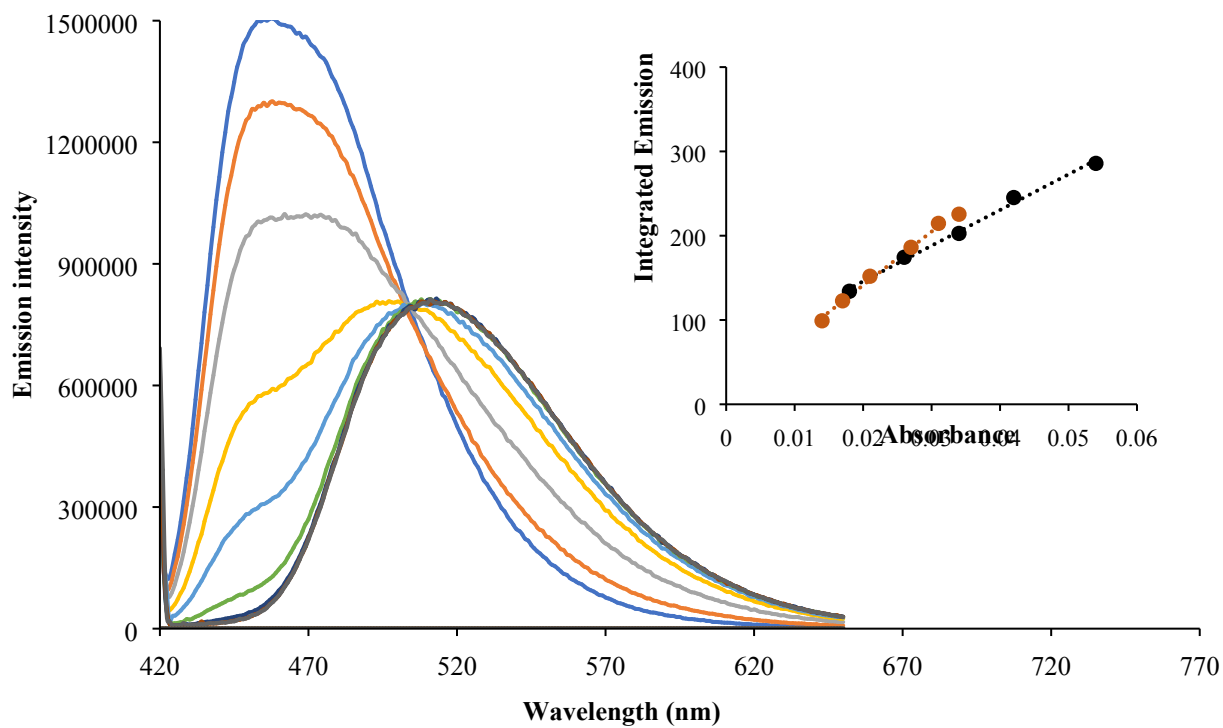

Figure S15. Quantum yield determination of [2-F]<sup>-</sup>

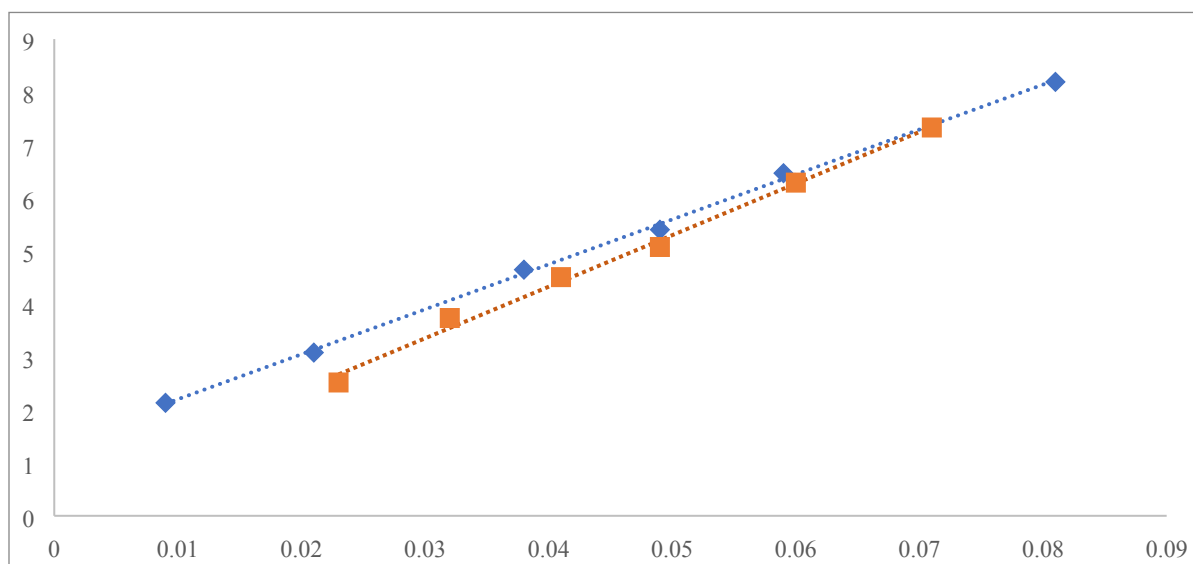

## 7. Cyclic voltammograms

Figure S16. Cyclic voltammogram of **1**

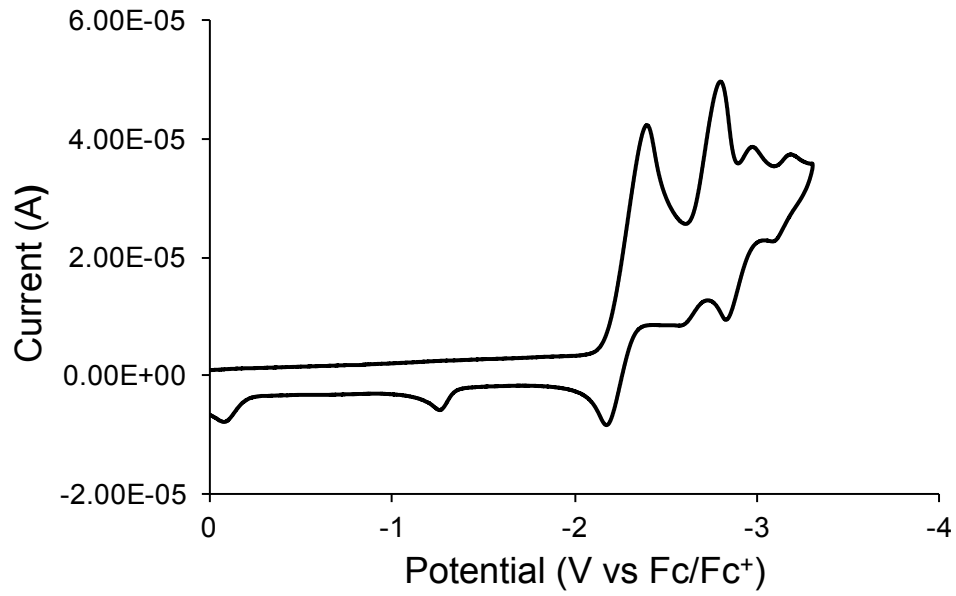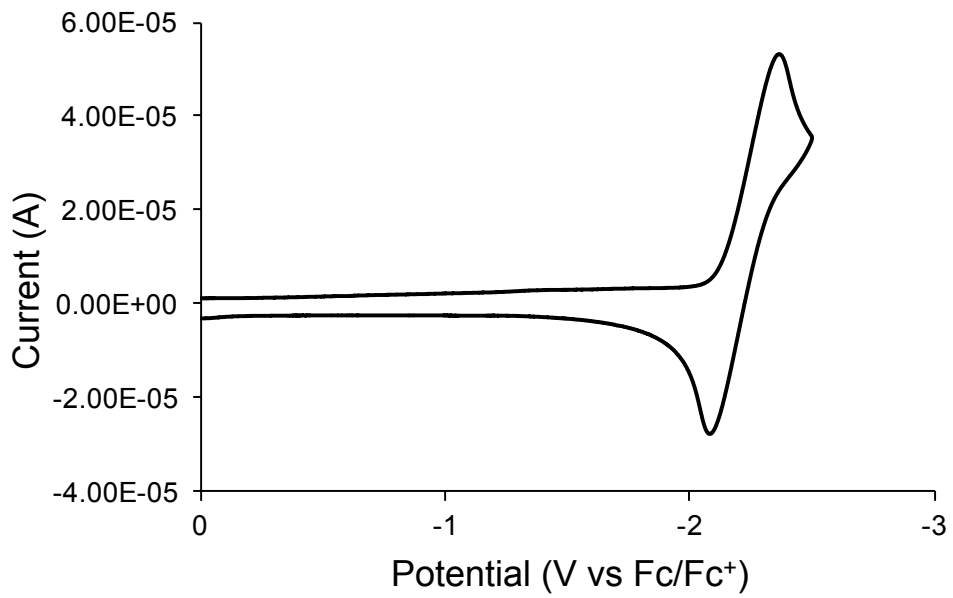

Figure S17. Cyclic voltammogram of **2**

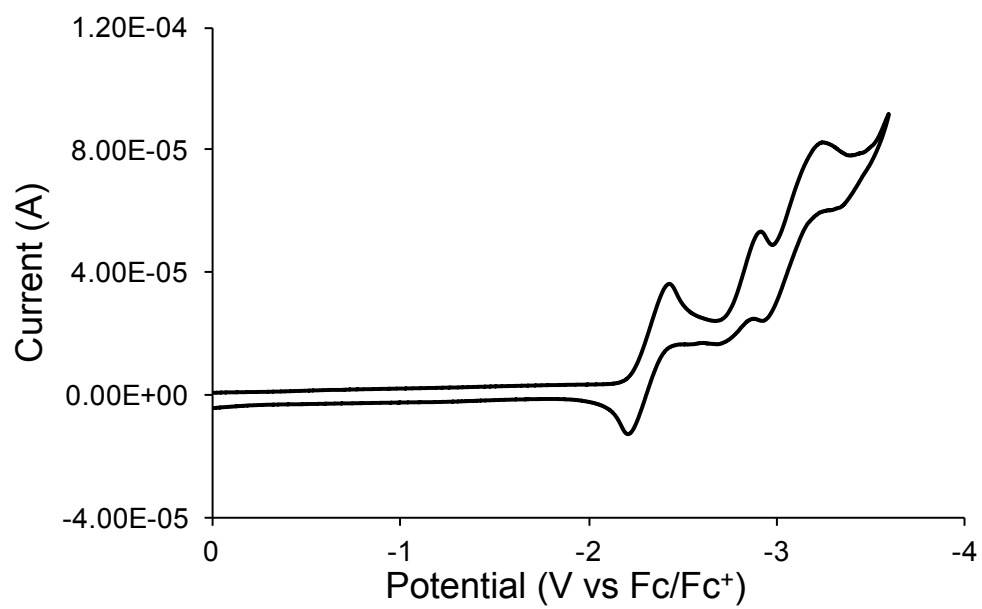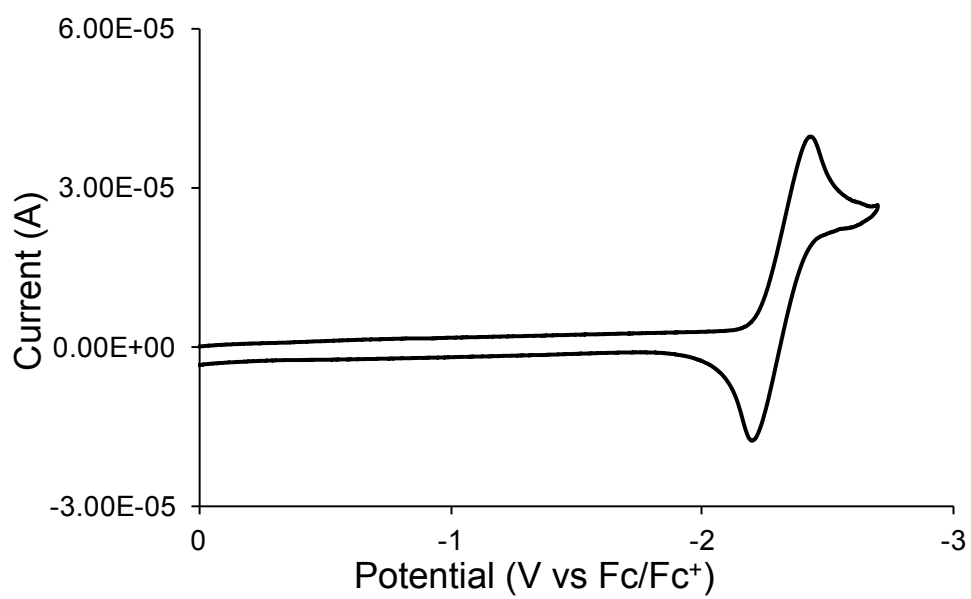

## 8. Mass spectroscopic studies

Figure S18. Mass spectrum of [1-F]<sup>-</sup>

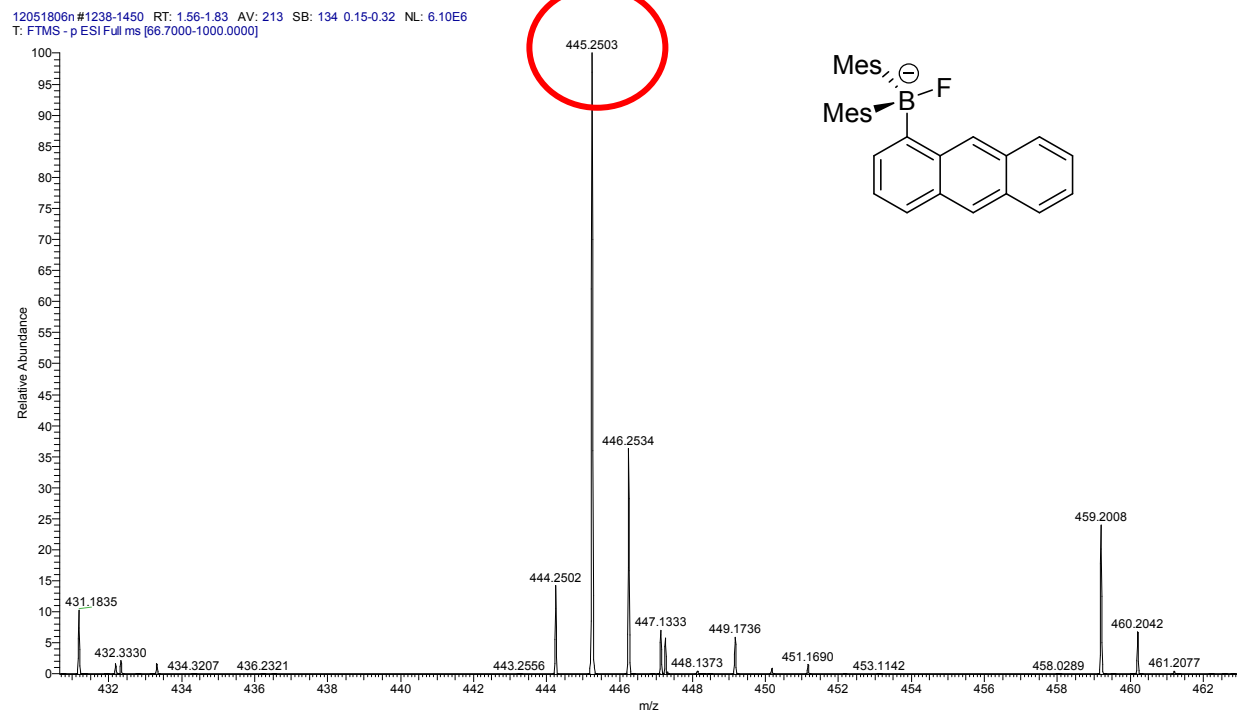

Figure S19. Mass spectrum of [1-CN]<sup>-</sup>

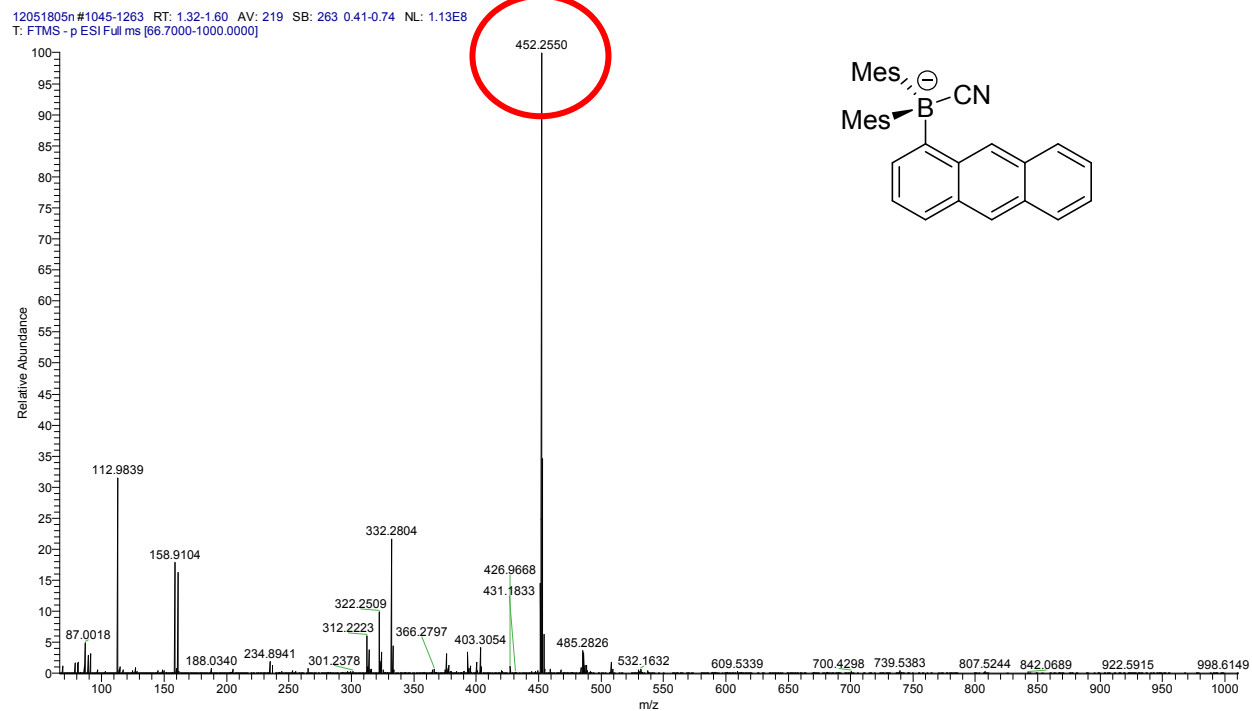

Figure S20. Mass spectrum of [2-F]<sup>-</sup>

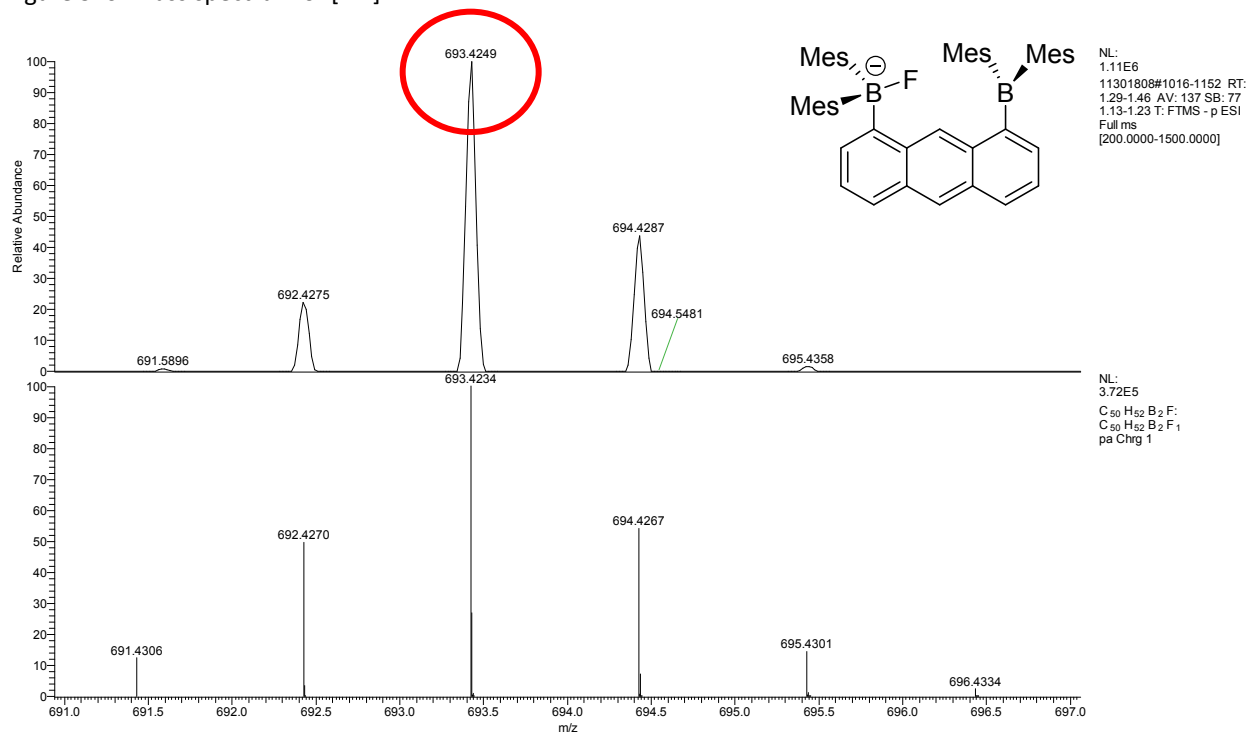

Figure S21. Mass spectrum of [2-CN]<sup>-</sup>

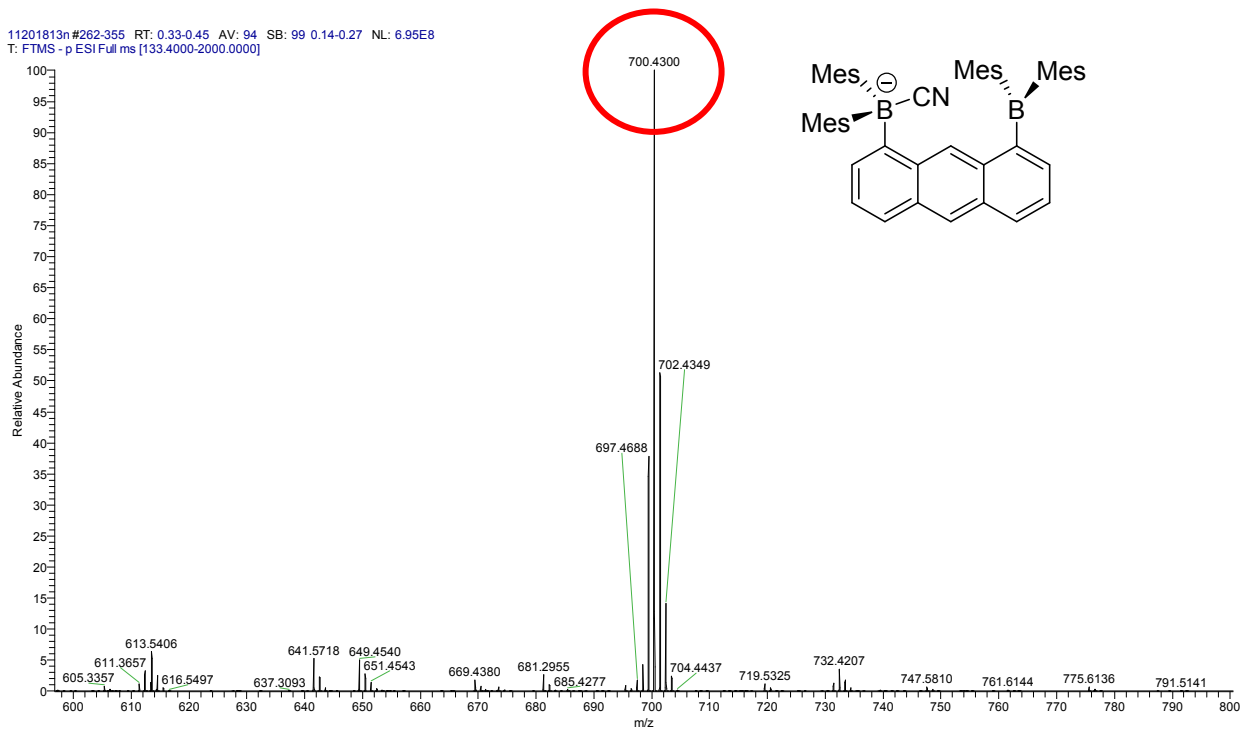

Supplement: c9dt03238j1.pdf [file c9dt03238j1.pdf]
